# Supplementary material
Source: Research Square preprint supplement (doi:10.21203/rs.3.rs-9635733/v1)
Supplement: Supplementary file 1 [file 5ae39443120afdd91490a00e.docx]

**Table 1.** Survey-weighted baseline characteristics of cancer survivors and cancer-free controls

|  | Survey-weighted percentage | SMD |
| --- | --- | --- |

|  | Cancer Survivor | Cancer-free Control |  |
| --- | --- | --- | --- |
| Age, mean ± SD, years | 57.0 ± 10.3 | 47.9 ± 16.3 | 0.670 |
| Region |  |  |  |
| Metropolitan | 52.4 | 54.4 | 0.040 |
| Province | 47.6 | 45.6 |  |
| Income quintile |  |  |  |
| Lowest | 19.0 | 19.9 | 0.197 |
| Low | 17.7 | 19.9 |  |
| Middle | 15.7 | 19.8 |  |
| High | 28.0 | 20.1 |  |
| Highest | 19.5 | 20.2 |  |
| Public assistance | 9.3 | 6.6 | 0.101 |
| Married | 96.4 | 82.1 | 0.460 |
| Non-smoker | 100.0 | 97.9 | 0.205 |
| Alcohol consumption* |  |  |  |
| Non-drinker | 53.9 | 31.4 | 0.485 |
| Occasional | 28.8 | 34.9 |  |
| Frequent | 17.3 | 33.7 |  |
| Regular physical activity† | 4.7 | 3.5 | 0.064 |
| Menstruation present | 3.0 | 7.8 | 0.211 |
| Comorbidity |  |  |  |
| Cardiovascular disease‡ | 1.8 | 1.5 | 0.022 |
| Hypertension | 21.3 | 18.4 | 0.073 |
| Dyslipidemia | 27.8 | 16.2 | 0.281 |
| Diabetes Mellitus | 9.1 | 6.9 | 0.081 |

Abbreviations: SMD, standardized mean difference.

*Alcohol consumption was categorized as non-drinker, occasional (<1–1 time/month), or frequent (≥2 times/month).

†Regular physical activity was defined as moderate-intensity activity ≥30 min on ≥5 days/week or vigorous-intensity activity ≥20 min on ≥3 days/week.

‡Cardiovascular disease includes myocardial infarction, angina, or stroke.
