# Supplementary material
Source: Research Square preprint supplement (doi:10.21203/rs.3.rs-9635733/v1)

**Supplementary materials**

**Supplementary Figure 1.** Flow diagram

**Supplementary Figure 2.** Association between relative grip strength and metabolic risk indicators across age groups

**Supplementary Figure 1.** Flow diagram


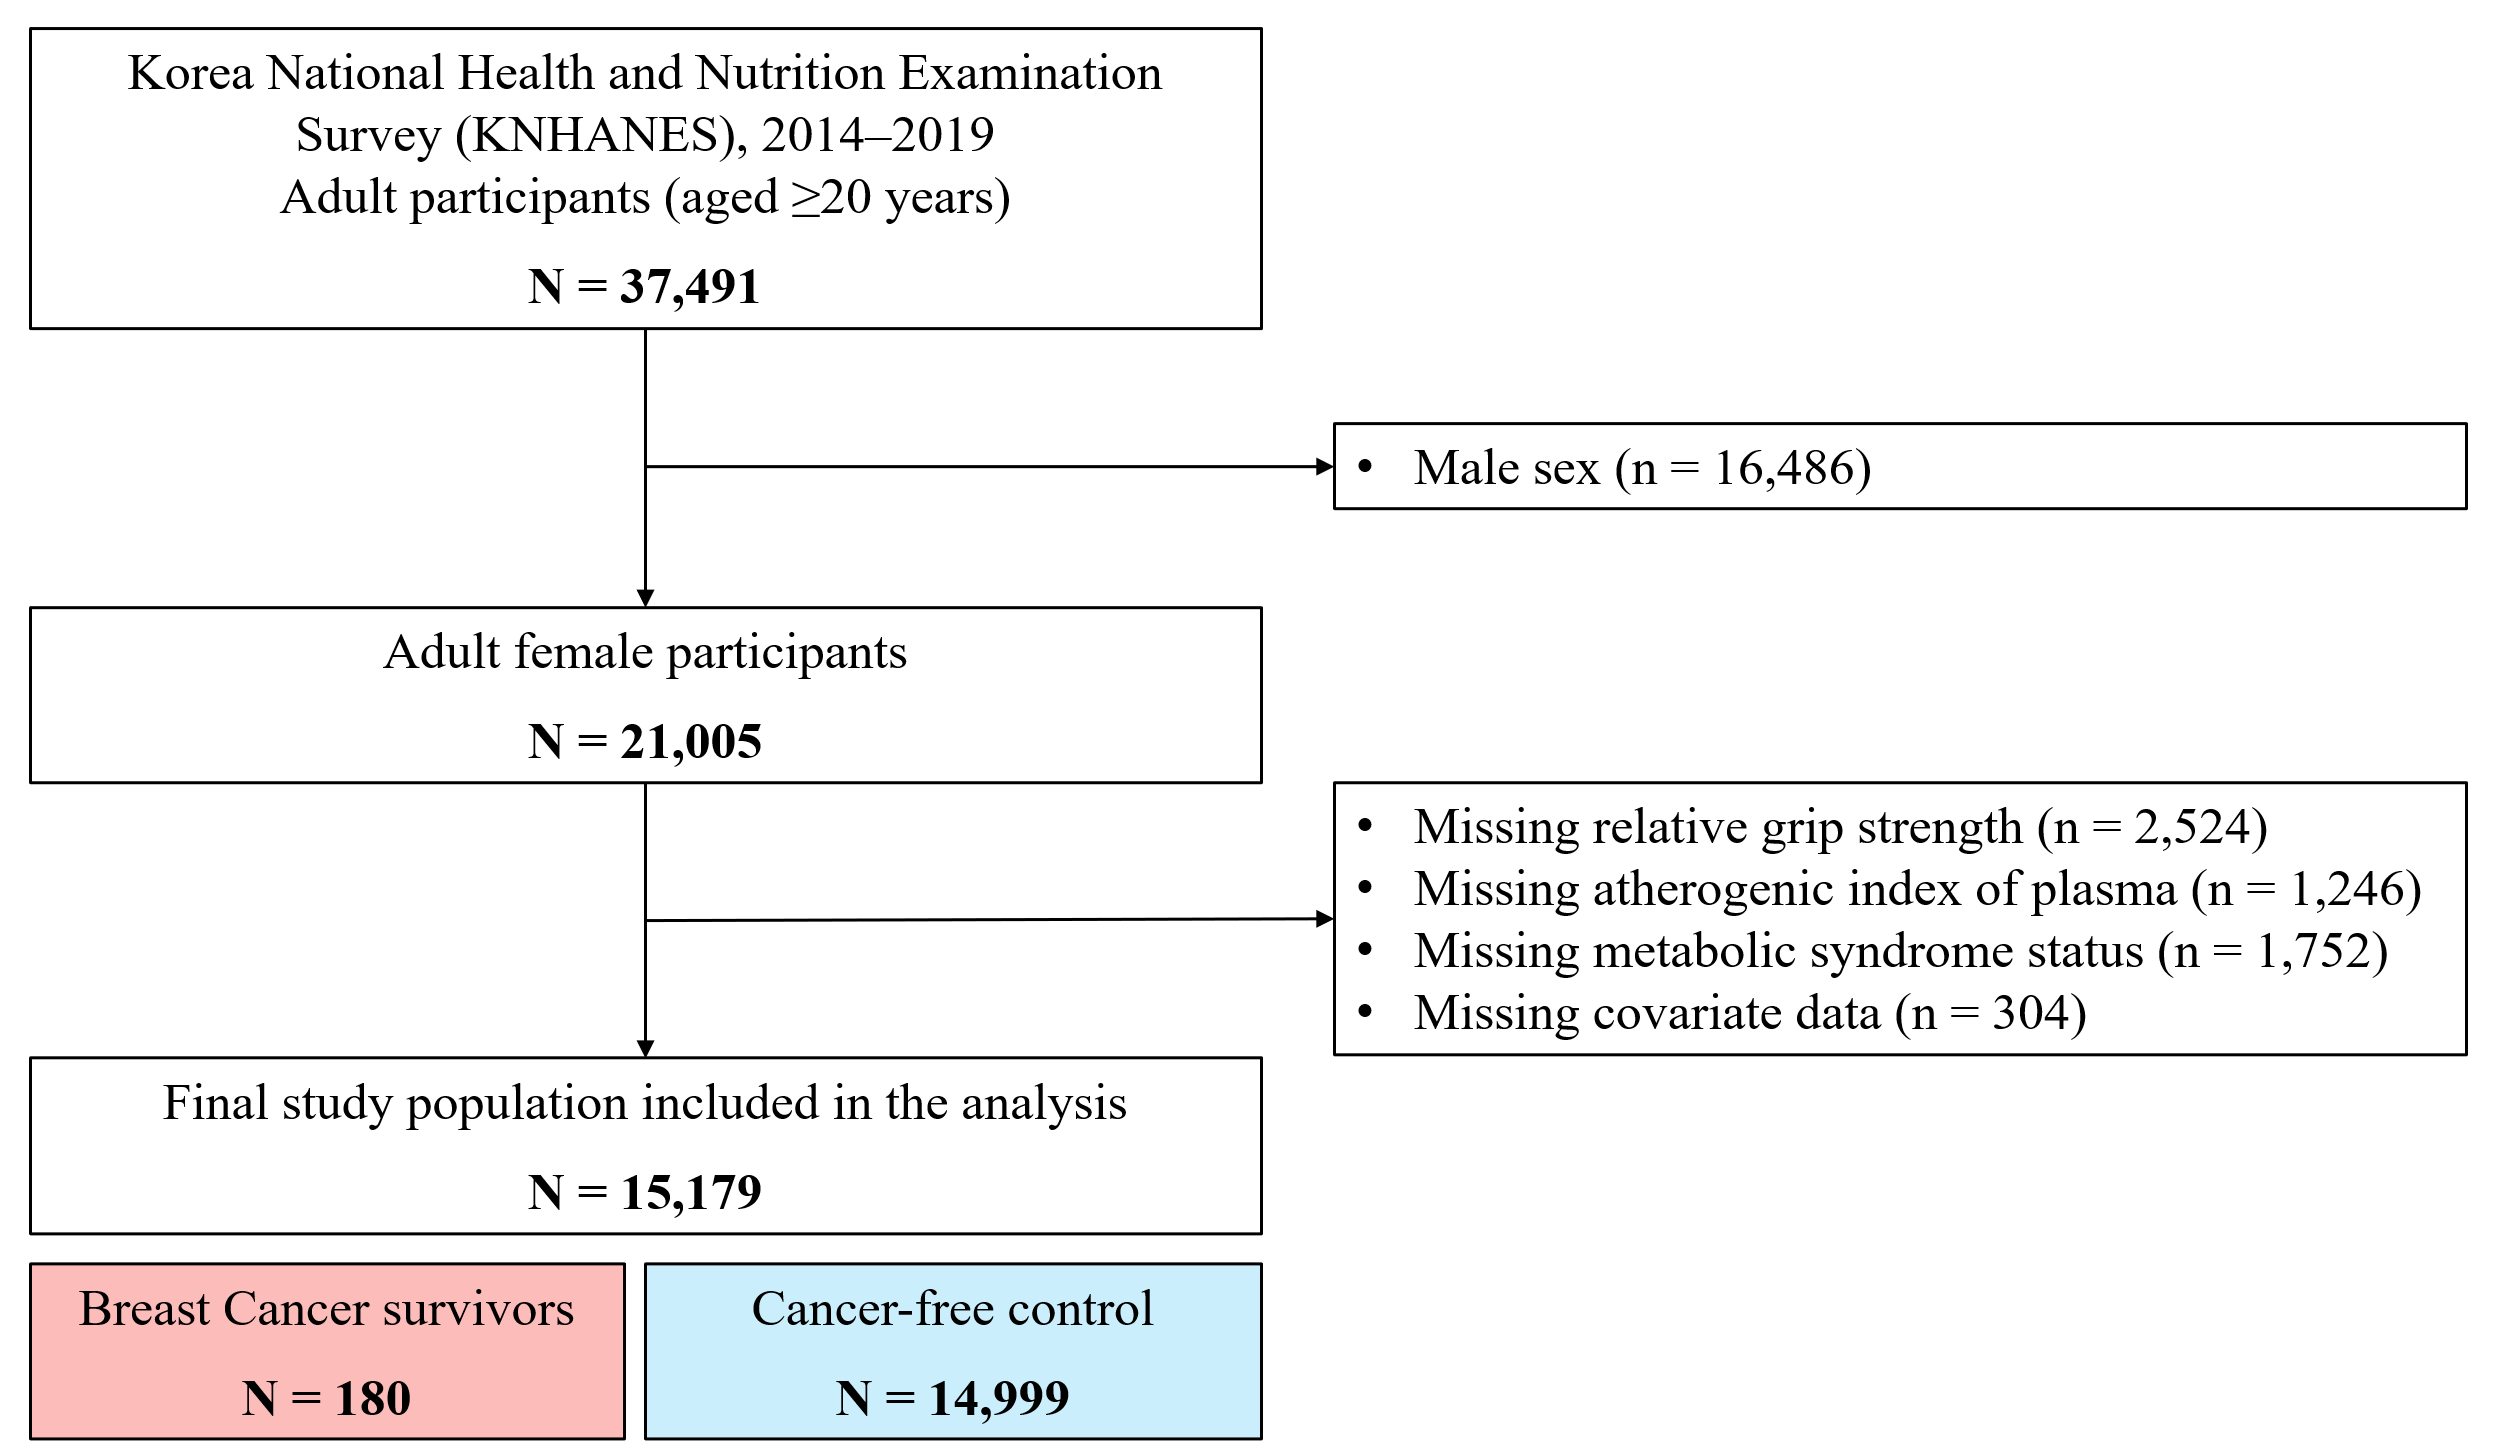


**Supplementary Figure 2.** Association between relative grip strength and metabolic risk indicators across age groups


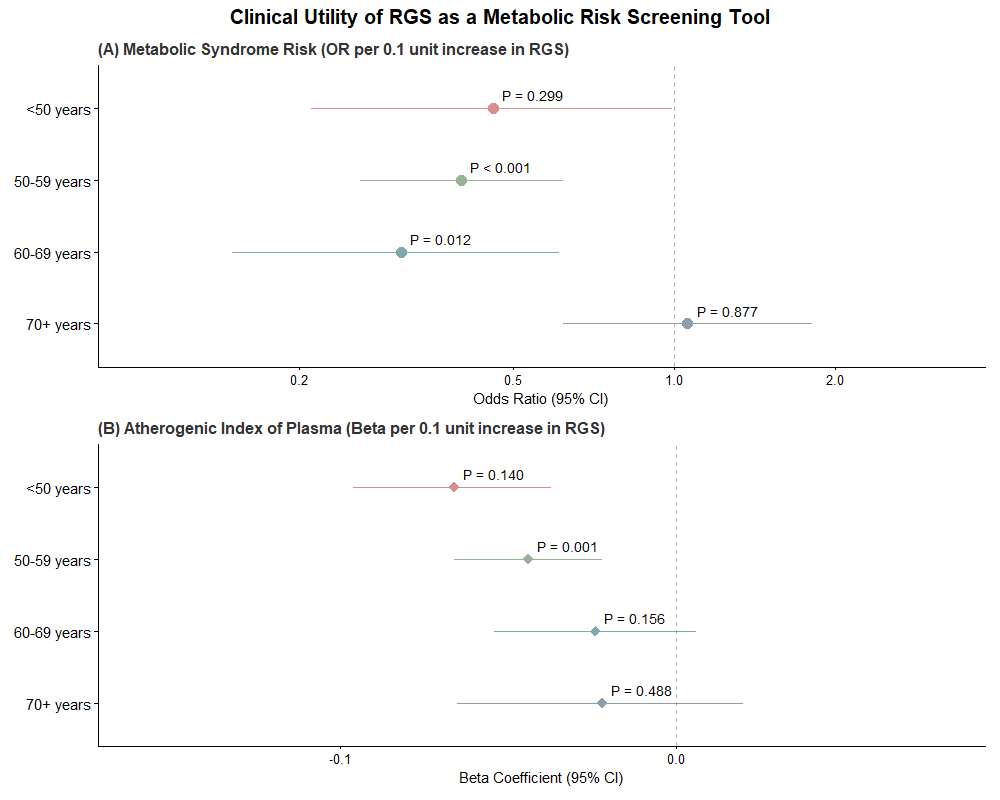

Supplement: Supplementary file 2 [file ae30eab8bd176df91adcb409.docx]
